# Supplementary material for: Uncovering the Physiological Mechanisms Underlying the Roe Deer (Capreolus capreolus) Testicular Cycle: Analyses of Gelatinases and VEGF Patterns and Correlation with Testes Weight and Testosterone
Source: PubMed Central journal article supplement (PMC7143327; doi:10.3390/ani10030444), 2020-03-06
Supplement: animals-10-00444-s001.pdf [file animals-10-00444-s001.pdf]

Supplementary file

**Uncovering the physiological mechanisms underlying the roe deer (*Capreolus capreolus*) testicular cycle: analyses of gelatinases and VEGF patterns and correlation with testes weight and testosterone**

Alberto Elmi, Augusta Zannoni, Nadia Govoni, Martina Bertocchi, Monica Forni, Domenico Ventrella and Maria Laura Bacci

**Table S1:** Descriptive statistics for the roe deer data divided per group.

|                             | Pre-rut         |                 |                                       | Post-rut        |               |                                       |
|-----------------------------|-----------------|-----------------|---------------------------------------|-----------------|---------------|---------------------------------------|
|                             | mean (SD)       | min ; max       | normal distribution<br><i>p</i> value | mean (SD)       | min; max      | normal distribution<br><i>p</i> value |
| Age months                  | 39 (15)         | 24; 72          | 0.037                                 | 32 (10)         | 15; 48        | 0.744                                 |
| Body Weight kg              | 23.9 (6.0)      | 17.5; 32.5      | 0.788                                 | 22.0 (2.2)      | 19.0; 26.0    | 0.808                                 |
| Height at the withers cm    | 74.58 (3.17)    | 69.30; 77.50    | 0.254                                 | 75.62 (2.99)    | 70.20; 78.00  | 0.021                                 |
| Testicular Weight g         | 20.47 (5.26)    | 10.24; 26.61    | 0.358                                 | 11.11 (5.26)    | 7.20; 23.42   | 0.006                                 |
| Testosterone pg/mg          | 917.39 (676.30) | 248.87; 2419.75 | 0.121                                 | 281.18 (261.18) | 48.22; 848.00 | 0.069                                 |
| pro-MMP2 AU×10 <sup>5</sup> | 2.24 (0.61)     | 9.84; 3.11      | 0.484                                 | 3.41 (1.01)     | 1.86; 5.45    | 0.806                                 |
| VEGF 121 ΔCT                | -2.40 (0.68)    | -3.28; -1.33    | 0.551                                 | -2.53 (0.58)    | -3.46; -1.49  | 0.948                                 |
| VEGF 165 ΔCT                | -4.07 (0.63)    | -4.75; -2.99    | 0.162                                 | -4.38 (1.01)    | -6.29; -2.73  | 0.885                                 |
| VEGFR1 ΔCT                  | -5.08 (0.96)    | -6.70; -3.08    | 0.335                                 | -4.79 (0.66)    | -5.69; -3.97  | 0.019                                 |
| VGFR2 ΔCT                   | -2.80 (0.57)    | -3.79; -1.80    | 0.899                                 | -2.95 (0.50)    | -3.50; -1.86  | 0.218                                 |
| TIMP1 ΔCT                   | -0.90 (0.79)    | -2.05; 0.09     | 0.398                                 | -1.51 (0.88)    | -2.74; -0.17  | 0.458                                 |
| TIMP2 ΔCT                   | 1.63 (0.74)     | 0.58; 2.50      | 0.105                                 | 1.44 (0.74)     | 0.19; 2.28    | 0.318                                 |

Normal distribution was assessed by means of the Shapiro–Wilk test (C.I. 95%).
